# Supplementary material for: The changing career paths of PhDs and postdocs trained at EMBL
Source: eLife. 2023 Nov 23;12:e78706. doi: 10.7554/eLife.78706 (PMC10666930; doi:10.7554/eLife.78706)
Supplement: Figure 1—source data 1. [file elife-78706-fig1-data1.xlsx]

## Sheet: Figure 1
Figure 1 A - current role in 2021					Figure 1B left panel - position 5 years after PhD defense, PhD alumni				Figure 1B left panel - position 5 years after EMBL postdoc ended
	type_pre_postdoc	timepointLast	count		cohort	position_5	count		cohort	position_5	count
1	PhD	unknown	106		1997-2004	unknown	61		1997-2004	unknown	120
2	PhD	NonSci	47		1997-2004	NonSci	7		1997-2004	NonSci	7
3	PhD	NonRes	178		1997-2004	NonRes	19		1997-2004	NonRes	22
4	PhD	IndR	153		1997-2004	IndR	29		1997-2004	IndR	51
5	PhD	AcPD	168		1997-2004	AcPD	71		1997-2004	AcPD	17
6	PhD	AcOt	102		1997-2004	AcOt	18		1997-2004	AcOt	48
7	PhD	AcPI	215		1997-2004	AcPI	51		1997-2004	AcPI	104
8	postdoc	unknown	143		2005-2012	unknown	51		2005-2012	unknown	128
9	postdoc	NonSci	44		2005-2012	NonSci	15		2005-2012	NonSci	7
10	postdoc	NonRes	171		2005-2012	NonRes	47		2005-2012	NonRes	47
11	postdoc	IndR	179		2005-2012	IndR	40		2005-2012	IndR	32
12	postdoc	AcPD	76		2005-2012	AcPD	135		2005-2012	AcPD	42
13	postdoc	AcOt	281		2005-2012	AcOt	28		2005-2012	AcOt	75
14	postdoc	AcPI	421		2005-2012	AcPI	25		2005-2012	AcPI	91
					2013-2020	unknown	30		2013-2020	unknown	47
					2013-2020	NonSci	13		2013-2020	NonSci	11
					2013-2020	NonRes	27		2013-2020	NonRes	25
					2013-2020	IndR	35		2013-2020	IndR	36
					2013-2020	AcPD	71		2013-2020	AcPD	21
					2013-2020	AcOt	14		2013-2020	AcOt	56
					2013-2020	AcPI	13		2013-2020	AcPI	66
					Excludes 169 PhD alumni who had not reached the 5-year timepoint in 2021				Excludes 262 postdoc alumni who had not reached the 5-year timepoint in 2021
