# Supplementary material for: The changing career paths of PhDs and postdocs trained at EMBL
Source: eLife. 2023 Nov 23;12:e78706. doi: 10.7554/eLife.78706 (PMC10666930; doi:10.7554/eLife.78706)
Supplement: Figure 2—figure supplement 1—source data 1. [file elife-78706-fig2-figsupp1-data1.xlsx]

## Sheet: Figure 2 - figure supplemet 1
Summary data plotted in Figure 2 - Figure Supplement 1.
Distribution in calendar years between PhD conferral and start of first PI role (PhDtoGL) or leaving EMBL and starting first PI role (EMBLtoPI) by cohort for PhD alumni (A) or postdoc alumni (B and C)
Figure2_fs1_1A_sourcedata				Figure2_fs1_1B_sourcedata				Figure2_fs1_1C_sourcedata
cohort	PhDtoGL	count		cohort	EMBLtoPI	count		cohort	PhDtoGL	count
1997-2004	1	3		1997-2004	0	40		1997-2004	1	1
1997-2004	2	5		1997-2004	1	15		1997-2004	2	6
1997-2004	3	9		1997-2004	2	13		1997-2004	3	6
1997-2004	4	17		1997-2004	3	9		1997-2004	4	11
1997-2004	5	16		1997-2004	4	13		1997-2004	5	10
1997-2004	6	17		1997-2004	5	7		1997-2004	6	18
1997-2004	7	8		1997-2004	6	5		1997-2004	7	11
1997-2004	8	5		1997-2004	7	6		1997-2004	8	3
1997-2004	9	9		1997-2004	8	3		1997-2004	9	4
2005-2012	1	2		1997-2004	9	8		2005-2012	2	3
2005-2012	2	2		2005-2012	0	36		2005-2012	3	5
2005-2012	3	6		2005-2012	1	16		2005-2012	4	6
2005-2012	4	5		2005-2012	2	9		2005-2012	5	18
2005-2012	5	8		2005-2012	3	7		2005-2012	6	17
2005-2012	6	14		2005-2012	4	13		2005-2012	7	8
2005-2012	7	10		2005-2012	5	6		2005-2012	8	11
2005-2012	8	14		2005-2012	6	5		2005-2012	9	8
2005-2012	9	7		2005-2012	7	3
				2005-2012	8	2
				2005-2012	9	2
