# Supplementary material for: The changing career paths of PhDs and postdocs trained at EMBL
Source: eLife. 2023 Nov 23;12:e78706. doi: 10.7554/eLife.78706 (PMC10666930; doi:10.7554/eLife.78706)
Supplement: Figure 3—figure supplement 1—source data 1. [file elife-78706-fig3-figsupp1-data1.xlsx]

## Sheet: Figure 3- FS1
Summary data plotted in Figure 3 - Figure Supplement 1.
Distribution in calendar years between PhD conferral and start of first PI role (PhDtoGL) or leaving EMBL and starting first PI role (EMBLtoPI) by gender for PhD alumni (A) or postdoc alumni (B and C)
Figure3_FigureSupplement_1A				Figure3_FigureSupplement_1B				Figure3_FigureSupplement1C
gender	PhDtoGL	count		gender	EMBLtoPI	count		cohort	PhDtoGL	count
f	2	2		f	0	14		f	2	2
f	3	4		f	1	10		f	3	1
f	4	6		f	2	5		f	4	6
f	5	3		f	3	3		f	5	6
f	6	11		f	4	11		f	6	10
f	7	7		f	5	3		f	7	5
f	8	8		f	6	4		f	8	1
f	9	5		f	7	1		f	9	4
m	1	5		f	8	2		m	1	1
m	2	5		f	9	5		m	2	7
m	3	11		m	0	62		m	3	10
m	4	16		m	1	21		m	4	11
m	5	21		m	2	17		m	5	22
m	6	20		m	3	13		m	6	25
m	7	11		m	4	15		m	7	14
m	8	11		m	5	10		m	8	13
m	9	11		m	6	6		m	9	8
				m	7	8
				m	8	3
				m	9	5
