# Supplementary material for: The changing career paths of PhDs and postdocs trained at EMBL
Source: eLife. 2023 Nov 23;12:e78706. doi: 10.7554/eLife.78706 (PMC10666930; doi:10.7554/eLife.78706)
Supplement: Figure 3—source data 1. [file elife-78706-fig3-data1.xlsx]

## Sheet: Figure 1
Figure 1 A - current role in 2021					Figure 1B left panel - position 5 years after PhD defense, PhD alumni				Figure 1B left panel - position 5 years after EMBL postdoc ended
	type_pre_postdoc	timepointLast	count		cohort	position_5	count		cohort	position_5	count
1	PhD	unknown	106		1997-2004	unknown	61		1997-2004	unknown	120
2	PhD	NonSci	47		1997-2004	NonSci	7		1997-2004	NonSci	7
3	PhD	NonRes	178		1997-2004	NonRes	19		1997-2004	NonRes	22
4	PhD	IndR	153		1997-2004	IndR	29		1997-2004	IndR	51
5	PhD	AcPD	168		1997-2004	AcPD	71		1997-2004	AcPD	17
6	PhD	AcOt	102		1997-2004	AcOt	18		1997-2004	AcOt	48
7	PhD	AcPI	215		1997-2004	AcPI	51		1997-2004	AcPI	104
8	postdoc	unknown	143		2005-2012	unknown	51		2005-2012	unknown	128
9	postdoc	NonSci	44		2005-2012	NonSci	15		2005-2012	NonSci	7
10	postdoc	NonRes	171		2005-2012	NonRes	47		2005-2012	NonRes	47
11	postdoc	IndR	179		2005-2012	IndR	40		2005-2012	IndR	32
12	postdoc	AcPD	76		2005-2012	AcPD	135		2005-2012	AcPD	42
13	postdoc	AcOt	281		2005-2012	AcOt	28		2005-2012	AcOt	75
14	postdoc	AcPI	421		2005-2012	AcPI	25		2005-2012	AcPI	91
					2013-2020	unknown	30		2013-2020	unknown	47
					2013-2020	NonSci	13		2013-2020	NonSci	11
					2013-2020	NonRes	27		2013-2020	NonRes	25
					2013-2020	IndR	35		2013-2020	IndR	36
					2013-2020	AcPD	71		2013-2020	AcPD	21
					2013-2020	AcOt	14		2013-2020	AcOt	56
					2013-2020	AcPI	13		2013-2020	AcPI	66
					Excludes 169 PhD alumni who had not reached the 5-year timepoint in 2021				Excludes 262 postdoc alumni who had not reached the 5-year timepoint in 2021

## Sheet: Figure 1 FS1
AcPI	source	target	value
1	1	7	111	0.205937		Code
2	2	7	406	0.753247		0	Previous role = AcPI
3	3	7	6	0.0111317		1	Previous role = AcOt
4	4	7	14	0.025974		2	Previous role = AcPD
5	5	7	1	0.00185529		3	Previous role = AcPhD
6	6	7	1	0.00185529		4	Previous role = IndR
7	7	14	502	0.931354		5	Previous role = NonR
8	7	15	8	0.0148423		6	Previous role = NonSci
9	7	18	21	0.038961
10	7	19	7	0.012987						Totals
11	7	20	1	0.00185529		7	= career area of interest = AcPI			539
						8	= career area of interest = AcOt			477
AcOt	source	target	value			11	= career area of interest = IndR			415
1	0	8	7	0.0146751		12	= career area of interest = NonR			364
2	2	8	393	0.823899		13	= career area of interest = NonSci			131
3	3	8	38	0.0796646
4	4	8	21	0.0440252
5	5	8	12	0.0251572
6	6	8	6	0.0125786
7	8	14	112	0.234801
8	8	15	248	0.519916
9	8	16	6	0.0125786		14	Current role = AcPI
10	8	18	57	0.119497		15	Current role = AcOt
11	8	19	46	0.0964361		16	Current role = AcPD
12	8	20	8	0.0167715		17	Current role = AcPhD
						18	Current role = IndR
IndR	source	target	value			19	Current role = NonR
1	0	11	23	0.0554217		20	Current role = NonSci
2	1	11	55	0.13253
3	2	11	234	0.563855
4	3	11	84	0.20241
5	5	11	15	0.0361446
6	6	11	4	0.00963855
7	11	14	22	0.053012
8	11	15	17	0.0409639
9	11	16	2	0.00481928
10	11	18	297	0.715663
11	11	19	68	0.163855
12	11	20	9	0.0216867
NonR	source	target	value
1	0	12	8	0.021978
2	1	12	37	0.101648
3	2	12	150	0.412088
4	3	12	70	0.192308
5	4	12	61	0.167582
6	6	12	38	0.104396
7	12	14	6	0.0164835
8	12	15	9	0.0247253
9	12	16	5	0.0137363
10	12	18	11	0.0302198
11	12	19	305	0.837912
12	12	20	28	0.0769231
NonSci	source	target	value
1	0	13	2	0.0152672
2	1	13	8	0.0610687
3	2	13	44	0.335878
4	3	13	33	0.251908
5	4	13	13	0.0992366
6	5	13	31	0.236641
7	13	14	2	0.0152672
8	13	15	5	0.0381679
9	13	18	4	0.0305344
10	13	19	44	0.335878
11	13	20	76	0.580153

## Sheet: Figure 1 FS2
cohort	position_1	count		cohort	position_1	count
1997-2004	unknown	64		1997-2004	unknown	135
1997-2004	NonSci	5		1997-2004	NonSci	4
1997-2004	NonRes	5		1997-2004	NonRes	13
1997-2004	IndR	22		1997-2004	IndR	39
1997-2004	AcPD	148		1997-2004	AcPD	73
1997-2004	AcOt	8		1997-2004	AcOt	47
1997-2004	AcPI	4		1997-2004	AcPI	58
2005-2012	unknown	60		2005-2012	unknown	137
2005-2012	NonSci	17		2005-2012	NonSci	8
2005-2012	NonRes	26		2005-2012	NonRes	24
2005-2012	IndR	16		2005-2012	IndR	24
2005-2012	AcPD	204		2005-2012	AcPD	92
2005-2012	AcOt	14		2005-2012	AcOt	82
2005-2012	AcPI	4		2005-2012	AcPI	55
2013-2020	unknown	62		2013-2020	unknown	102
2013-2020	NonSci	11		2013-2020	NonSci	11
2013-2020	NonRes	38		2013-2020	NonRes	40
2013-2020	IndR	46		2013-2020	IndR	70
2013-2020	AcPD	200		2013-2020	AcPD	110
2013-2020	AcOt	14		2013-2020	AcOt	115
2013-2020	AcPI	1		2013-2020	AcPI	76
cohort	position_5	count		cohort	position_5	count
1997-2004	unknown	61		1997-2004	unknown	120
1997-2004	NonSci	7		1997-2004	NonSci	7
1997-2004	NonRes	19		1997-2004	NonRes	22
1997-2004	IndR	29		1997-2004	IndR	51
1997-2004	AcPD	71		1997-2004	AcPD	17
1997-2004	AcOt	18		1997-2004	AcOt	48
1997-2004	AcPI	51		1997-2004	AcPI	104
2005-2012	unknown	51		2005-2012	unknown	128
2005-2012	NonSci	15		2005-2012	NonSci	7
2005-2012	NonRes	47		2005-2012	NonRes	47
2005-2012	IndR	40		2005-2012	IndR	32
2005-2012	AcPD	135		2005-2012	AcPD	42
2005-2012	AcOt	28		2005-2012	AcOt	75
2005-2012	AcPI	25		2005-2012	AcPI	91
2013-2020	unknown	30		2013-2020	unknown	47
2013-2020	NonSci	13		2013-2020	NonSci	11
2013-2020	NonRes	27		2013-2020	NonRes	25
2013-2020	IndR	35		2013-2020	IndR	36
2013-2020	AcPD	71		2013-2020	AcPD	21
2013-2020	AcOt	14		2013-2020	AcOt	56
2013-2020	AcPI	13		2013-2020	AcPI	66
2013-2020	timepoint not reached	169	(excluded)	2013-2020	timepoint not reached	262	(excluded)
cohort	position_9	count		cohort	position_9	count
1997-2004	unknown	53		1997-2004	unknown	111
1997-2004	NonSci	9		1997-2004	NonSci	6
1997-2004	NonRes	26		1997-2004	NonRes	31
1997-2004	IndR	34		1997-2004	IndR	44
1997-2004	AcPD	20		1997-2004	AcPD	4
1997-2004	AcOt	19		1997-2004	AcOt	45
1997-2004	AcPI	95		1997-2004	AcPI	128
2005-2012	unknown	51		2005-2012	unknown	131
2005-2012	NonSci	19		2005-2012	NonSci	9
2005-2012	NonRes	64		2005-2012	NonRes	62
2005-2012	IndR	46		2005-2012	IndR	41
2005-2012	AcPD	40		2005-2012	AcPD	10
2005-2012	AcOt	46		2005-2012	AcOt	70
2005-2012	AcPI	75		2005-2012	AcPI	99
2013-2020	timepoint not reached	372	(excluded)	2013-2020	timepoint not reached	524	(excluded)
cohort	position_13	count		cohort	position_13	count
1997-2004	unknown	51		1997-2004	unknown	112
1997-2004	NonSci	9		1997-2004	NonSci	8
1997-2004	NonRes	39		1997-2004	NonRes	33
1997-2004	IndR	28		1997-2004	IndR	43
1997-2004	AcPD	9		1997-2004	AcOt	37
1997-2004	AcOt	20		1997-2004	AcPI	136
1997-2004	AcPI	100		2005-2012	unknown	72
2005-2012	unknown	29		2005-2012	NonSci	5
2005-2012	NonSci	9		2005-2012	NonRes	39
2005-2012	NonRes	39		2005-2012	IndR	15
2005-2012	IndR	21		2005-2012	AcPD	2
2005-2012	AcPD	8		2005-2012	AcOt	23
2005-2012	AcOt	14		2005-2012	AcPI	53
2005-2012	AcPI	43		2005-2012	timepoint not reached	213	(excluded)
2005-2012	timepoint not reached	178	(excluded)	2013-2020	timepoint not reached	524	(excluded)
2013-2020	timepoint not reached	372	(excluded)
cohort	position_17	count		cohort	position_17	count
1997-2004	unknown	51		1997-2004	unknown	112
1997-2004	NonSci	12		1997-2004	NonSci	10
1997-2004	NonRes	41		1997-2004	NonRes	37
1997-2004	IndR	31		1997-2004	IndR	37
1997-2004	AcPD	4		1997-2004	AcPD	1
1997-2004	AcOt	19		1997-2004	AcOt	38
1997-2004	AcPI	98		1997-2004	AcPI	134
2005-2012	timepoint not reached	341	(excluded)	2005-2012	timepoint not reached	422	(excluded)
2013-2020	timepoint not reached	372	(excluded)	2013-2020	timepoint not reached	524	(excluded)

## Sheet: Figure 2
See table S4 in supplementary figure 1 for the hazard ratios, confidence intervals and p-values for each model
The code can be found at https://github.com/Huber-group-EMBL/EMBL-Career-Analysis

## Sheet: Figure 2 - figure supplemet 1
Figure2_fs1_1A_sourcedata				Figure2_fs1_1B_sourcedata				Figure2_fs1_1C_sourcedata
				cohort	EMBLtoPI	count		cohort	PhDtoGL	count
cohort	PhDtoGL	count		1997-2004	0	40	0	1997-2004	1	1	1
1997-2004	1	3	3	1997-2004	1	15	15	1997-2004	2	6	12
1997-2004	2	5	10	1997-2004	2	13	26	1997-2004	3	6	18
1997-2004	3	9	27	1997-2004	3	9	27	1997-2004	4	11	44
1997-2004	4	17	68	1997-2004	4	13	52	1997-2004	5	10	50
1997-2004	5	16	80	1997-2004	5	7	35	1997-2004	6	18	108
1997-2004	6	17	102	1997-2004	6	5	30	1997-2004	7	11	77
1997-2004	7	8	56	1997-2004	7	6	42	1997-2004	8	3	24
1997-2004	8	5	40	1997-2004	8	3	24	1997-2004	9	4	36
1997-2004	9	9	81	1997-2004	9	8	72	2005-2012	2	3	6
2005-2012	1	2	2	2005-2012	0	36	0	2005-2012	3	5	15
2005-2012	2	2	4	2005-2012	1	16	16	2005-2012	4	6	24
2005-2012	3	6	18	2005-2012	2	9	18	2005-2012	5	18	90
2005-2012	4	5	20	2005-2012	3	7	21	2005-2012	6	17	102
2005-2012	5	8	40	2005-2012	4	13	52	2005-2012	7	8	56
2005-2012	6	14	84	2005-2012	5	6	30	2005-2012	8	11	88
2005-2012	7	10	70	2005-2012	6	5	30	2005-2012	9	8	72
2005-2012	8	14	112	2005-2012	7	3	21
2005-2012	9	7	63	2005-2012	8	2	16
				2005-2012	9	2	18
		89	5.24719			119	2.71429			70	5.28571
		68	6.07353			99	2.24242			76	5.96053
		157	5.6051			218	2.5			146	5.63699

## Sheet: Figure 3A
Summary data plotted in Figure 3A (current role by gender for PhD and postdoc alumni)
type_pre_postdoc	gender	timepointLast	count
PhD	f	unknown	56
PhD	f	NonSci	16
PhD	f	NonRes	90
PhD	f	IndR	53
PhD	f	AcPD	83
PhD	f	AcOt	40
PhD	f	AcPI	77
PhD	m	unknown	50
PhD	m	NonSci	31
PhD	m	NonRes	88
PhD	m	IndR	100
PhD	m	AcPD	85
PhD	m	AcOt	62
PhD	m	AcPI	138
postdoc	f	unknown	70
postdoc	f	NonSci	5
postdoc	f	NonRes	83
postdoc	f	IndR	52
postdoc	f	AcPD	44
postdoc	f	AcOt	109
postdoc	f	AcPI	129
postdoc	m	unknown	73
postdoc	m	NonSci	39
postdoc	m	NonRes	88
postdoc	m	IndR	127
postdoc	m	AcPD	32
postdoc	m	AcOt	172
postdoc	m	AcPI	292

## Sheet: Figure 3- FS1
Figure3_FigureSupplement_1A_SourceData1				Figure3_FigureSupplement_1B_SourceData1				Figure3_FigureSupplement1C_SourceData1
				gender	EMBLtoPI	count		cohort	PhDtoGL	count
gender	PhDtoGL	count		f	0	14	0	f	2	2	4
f	2	2	4	f	1	10	10	f	3	1	3
f	3	4	12	f	2	5	10	f	4	6	24
f	4	6	24	f	3	3	9	f	5	6	30
f	5	3	15	f	4	11	44	f	6	10	60
f	6	11	66	f	5	3	15	f	7	5	35
f	7	7	49	f	6	4	24	f	8	1	8
f	8	8	64	f	7	1	7	f	9	4	36
f	9	5	45	f	8	2	16	m	1	1	1
m	1	5	5	f	9	5	45	m	2	7	14
m	2	5	10	m	0	62	0	m	3	10	30
m	3	11	33	m	1	21	21	m	4	11	44
m	4	16	64	m	2	17	34	m	5	22	110
m	5	21	105	m	3	13	39	m	6	25	150
m	6	20	120	m	4	15	60	m	7	14	98
m	7	11	77	m	5	10	50	m	8	13	104
m	8	11	88	m	6	6	36	m	9	8	72
m	9	11	99	m	7	8	56
			0	m	8	3	24
				m	9	5	45
		46	6.06522			58	3.10345			35	5.71429
		111	5.41441			160	2.28125			111	5.61261
		157	5.6051			218	2.5			146	5.63699

## Sheet: Figure 4
Figure 4A - Source Data 1					Figure 4B						Figure 4D
	was_GL	pubs_FIRST_ra_only_TOTAL	n			count	x	xmin	xmax	was_GL
1	y	0	80		1	1	-4	-4.5	-3.5	n	predictors	x.mean	x.sd	x.n	se	role	preOrPostDoc
2	y	1	177		2	6	-3	-3.5	-2.5	n	publications	0.689925	0.0407452	10	0.0128848	AcPI	both
3	y	2	177		3	32	-2	-2.5	-1.5	n	group_publications	0.611108	0.059128	10	0.0186979	AcPI	both
4	y	3	118		4	146	-1	-1.5	-0.5	n	nationality	0.50127	0.0518437	10	0.0163944	AcPI	both
5	y	4	51		5	339	0	-0.5	0.5	n	gender	0.567059	0.0215074	10	0.00680125	AcPI	both
6	y	5	37		6	346	1	0.5	1.5	n	group_leaderseniority	0.46753	0.0351744	10	0.0111231	AcPI	both
7	y	6	22		7	127	2	1.5	2.5	n	time_cohort	0.592571	0.0506352	10	0.0160123	AcPI	both
8	y	> 6	23		8	35	3	2.5	3.5	n	type_pre_postdoc	0.55162	0.0668614	10	0.0211434	AcPI	both
9	NA	0	538		9	9	4	3.5	4.5	n	all	0.698322	0.0375084	10	0.0118612	AcPI	both
10	NA	1	562		10	0	5	4.5	5.5	n
11	NA	2	278		11	0	-4	-4.5	-3.5	y	x.mean=Harrell's C-index
12	NA	3	120		12	1	-3	-3.5	-2.5	y
13	NA	4	59		13	2	-2	-2.5	-1.5	y
14	NA	5	27		14	37	-1	-1.5	-0.5	y
15	NA	6	10		15	132	0	-0.5	0.5	y
16	NA	> 6	5		16	244	1	0.5	1.5	y
					17	137	2	1.5	2.5	y
					18	39	3	2.5	3.5	y
					19	7	4	3.5	4.5	y
					20	4	5	4.5	5.5	y

## Sheet: Figure 5
predictors	x.mean	x.sd	x.n	se	role	preOrPostDoc
publications	0.574561	0.0596722	10	0.01887	AcOt	both
group_publications	0.599332	0.0370571	10	0.0117185	AcOt	both
nationality	0.551599	0.0393592	10	0.0124465	AcOt	both
gender	0.457045	0.0328453	10	0.0103866	AcOt	both
group_leaderseniority	0.512045	0.0366858	10	0.0116011	AcOt	both
time_cohort	0.58671	0.049884	10	0.0157747	AcOt	both
type_pre_postdoc	0.581082	0.0468952	10	0.0148296	AcOt	both
all	0.639342	0.046342	10	0.0146546	AcOt	both
publications	0.531326	0.0346439	10	0.0109554	IndR	both
group_publications	0.600749	0.0715846	10	0.022637	IndR	both
nationality	0.506379	0.0861362	10	0.0272387	IndR	both
gender	0.476632	0.0745675	10	0.0235803	IndR	both
group_leaderseniority	0.4484	0.0254301	10	0.0080417	IndR	both
time_cohort	0.628227	0.0625104	10	0.0197675	IndR	both
type_pre_postdoc	0.549705	0.0420651	10	0.0133022	IndR	both
all	0.61211	0.0648929	10	0.0205209	IndR	both
publications	0.627655	0.0823348	10	0.0260365	NonRes	both
group_publications	0.571067	0.0906243	10	0.0286579	NonRes	both
nationality	0.569904	0.0856873	10	0.0270967	NonRes	both
gender	0.562518	0.0627077	10	0.0198299	NonRes	both
group_leaderseniority	0.468025	0.0583456	10	0.0184505	NonRes	both
time_cohort	0.647888	0.0506432	10	0.0160148	NonRes	both
type_pre_postdoc	0.591019	0.0406062	10	0.0128408	NonRes	both
all	0.683677	0.0646106	10	0.0204317	NonRes	both
publications	0.552535	0.116103	10	0.0367149	NonSci	both
group_publications	0.514271	0.167837	10	0.0530748	NonSci	both
nationality	0.549748	0.102156	10	0.0323046	NonSci	both
gender	0.575631	0.084939	10	0.0268601	NonSci	both
group_leaderseniority	0.50925	0.0840587	10	0.0265817	NonSci	both
time_cohort	0.689106	0.121259	10	0.0383454	NonSci	both
type_pre_postdoc	0.645172	0.0581925	10	0.0184021	NonSci	both
all	0.662935	0.128339	10	0.0405842	NonSci	both
	x.mean=Harrell's C-index

## Sheet: Figure 6
Figure 6A - number of authors per paper					Figure 6B - Source Data 1				Figure 6C - Source Data 1						Figure 6D - category normalized citation impact
	Publication.Date	count	wmean, authors per paper			cohort	pubs_RAonly_TOTAL	count		cohort	pubs_FIRST_ra_only_TOTAL	count				Publication.Date	count	mean, CNCI
1	1995	70	3.75714		1	1997-2004	0	80	1	1997-2004	0	150			1	1995	70	2.37143
2	1996	130	4.69231		2	1997-2004	1	80	2	1997-2004	1	160			2	1996	130	2.66766
3	1997	169	4.29586		3	1997-2004	10	11	3	1997-2004	2	135			3	1997	169	2.1067
4	1998	195	4.41026		4	1997-2004	11	3	4	1997-2004	3	94			4	1998	195	2.63674
5	1999	233	4.72961		5	1997-2004	12	5	5	1997-2004	4	32			5	1999	233	2.25489
6	2000	197	4.86294		6	1997-2004	13	5	6	1997-2004	5	23			6	2000	197	2.61805
7	2001	217	4.91705		7	1997-2004	2	116	7	1997-2004	6	15			7	2001	217	1.79891
8	2002	169	5.01183		8	1997-2004	3	97	8	1997-2004	> 6	16			8	2002	169	2.27119
9	2003	179	4.95531		9	1997-2004	4	64	9	2005-2012	0	211			9	2003	179	2.49857
10	2004	185	5.6973		10	1997-2004	5	59	10	2005-2012	1	256			10	2004	185	2.01332
11	2005	189	5.38624		11	1997-2004	6	27	11	2005-2012	2	145			11	2005	189	2.11278
12	2006	209	5.45455		12	1997-2004	7	26	12	2005-2012	3	76			12	2006	209	2.00597
13	2007	208	6.06731		13	1997-2004	8	19	13	2005-2012	4	34			13	2007	208	2.09128
14	2008	209	6.01818		14	1997-2004	9	13	14	2005-2012	5	23			14	2008	209	2.83765
15	2009	196	6.78571		15	1997-2004	> 13.9249999999997	20	15	2005-2012	6	9			15	2009	196	2.61672
16	2010	211	6.41706		16	2005-2012	0	107	16	2005-2012	> 6	9			16	2010	211	3.95123
17	2011	206	6.72816		17	2005-2012	1	144	17	2013-2020	0	257			17	2011	206	3.05339
18	2012	263	7.14373		18	2005-2012	10	9	18	2013-2020	1	323			18	2012	263	4.37656
19	2013	253	7.62055		19	2005-2012	11	10	19	2013-2020	2	175			19	2013	253	3.77523
20	2014	259	8.46718		20	2005-2012	12	6	20	2013-2020	3	68			20	2014	259	3.43844
21	2015	287	8.42857		21	2005-2012	13	3	21	2013-2020	4	44			21	2015	287	7.17743
22	2016	276	9.80435		22	2005-2012	2	128	22	2013-2020	5	18			22	2016	276	3.63403
23	2017	273	9.17949		23	2005-2012	3	109	23	2013-2020	6	8			23	2017	273	4.07438
24	2018	226	9.11504		24	2005-2012	4	85	24	2013-2020	> 6	3			24	2018	226	3.47925
25	2019	206	10.2476		25	2005-2012	5	51							25	2019	206	3.88964
26	2020	198	11.2879		26	2005-2012	6	39							26	2020	198	5.49232
					27	2005-2012	7	24
					28	2005-2012	8	22
					29	2005-2012	9	15
					30	2005-2012	> 13.9249999999997	11
					31	2013-2020	0	112
					32	2013-2020	1	168
					33	2013-2020	10	15
					34	2013-2020	11	9
					35	2013-2020	12	6
					36	2013-2020	13	4
					37	2013-2020	2	137
					38	2013-2020	3	125
					39	2013-2020	4	95
					40	2013-2020	5	61
					41	2013-2020	6	61
					42	2013-2020	7	32
					43	2013-2020	8	21
					44	2013-2020	9	23
					45	2013-2020	> 13.9249999999997	27
