# Supplementary material for: The changing career paths of PhDs and postdocs trained at EMBL
Source: eLife. 2023 Nov 23;12:e78706. doi: 10.7554/eLife.78706 (PMC10666930; doi:10.7554/eLife.78706)
Supplement: Figure 4—source data 1. [file elife-78706-fig4-data1.xlsx]

## Sheet: Figure 4
Figure 4A
Summary data for figure 4A - distribution of the number of first author publications
for alumni who hold/have held a principal investigator (AcPI) role (was_GL=y) or had never held an AcPI role (was_GL=n)
	was_GL	pubs_FIRST_ra_only_TOTAL	n
1	y	0	80
2	y	1	177
3	y	2	177
4	y	3	118
5	y	4	51
6	y	5	37
7	y	6	22
8	y	> 6	23	(>97.5 percentile, not plotted)
9	NA	0	538
10	NA	1	562
11	NA	2	278
12	NA	3	120
13	NA	4	59
14	NA	5	27
15	NA	6	10
16	NA	> 6	5	(>97.5 percentile, not plotted)
Figure 4B
Summary data for figure 4B - distribution of the log(category normalized citation impact (CNCI))
for alumni who hold/have held a principal investigator (AcPI) role (was_GL=y) or had never held an AcPI role (was_GL=n)
	count	x	log(CNCI) min	log(CNCI) max	was_GL
1	1	-4	-4.5	-3.5	n
2	6	-3	-3.5	-2.5	n
3	32	-2	-2.5	-1.5	n
4	146	-1	-1.5	-0.5	n
5	339	0	-0.5	0.5	n
6	346	1	0.5	1.5	n
7	127	2	1.5	2.5	n
8	35	3	2.5	3.5	n
9	9	4	3.5	4.5	n
10	0	5	4.5	5.5	n
11	0	-4	-4.5	-3.5	y
12	1	-3	-3.5	-2.5	y
13	2	-2	-2.5	-1.5	y
14	37	-1	-1.5	-0.5	y
15	132	0	-0.5	0.5	y
16	244	1	0.5	1.5	y
17	137	2	1.5	2.5	y
18	39	3	2.5	3.5	y
19	7	4	3.5	4.5	y
20	4	5	4.5	5.5	y
Figure 4D
Harrell’s C-Index for univariate or multivariate models with different sets of factors (predictors) for entry into academic principal investigator (AcPI) roles.
Values are based on 10-fold cross-validation using a Cox model with ridge penalty. x.mean is the mean C-index accross folds; x.sd the standard deviation, se standard error
predictors	x.mean	x.sd	x.n	se	role	preOrPostDoc
publications	0.689925	0.0407452	10	0.0128848	AcPI	both
group_publications	0.611108	0.059128	10	0.0186979	AcPI	both
nationality	0.50127	0.0518437	10	0.0163944	AcPI	both
gender	0.567059	0.0215074	10	0.00680125	AcPI	both
group_leaderseniority	0.46753	0.0351744	10	0.0111231	AcPI	both
time_cohort	0.592571	0.0506352	10	0.0160123	AcPI	both
type_pre_postdoc	0.55162	0.0668614	10	0.0211434	AcPI	both
all	0.698322	0.0375084	10	0.0118612	AcPI	both
x.mean=Harrell's C-index
