# Supplementary material for: The changing career paths of PhDs and postdocs trained at EMBL
Source: eLife. 2023 Nov 23;12:e78706. doi: 10.7554/eLife.78706 (PMC10666930; doi:10.7554/eLife.78706)
Supplement: Figure 5—source data 1. [file elife-78706-fig5-data1.xlsx]

## Sheet: Figure 5
Summary data plotted in figure 5
Figure 5A - winzorized mean number of authors per paper per year from 1995 to 2020.					Figure 5B - number of research articles (pubs_RAonly_TOTAL) by cohort					Figure 5C - number of first author research articles (pubs_FIRST_ra_only_TOTAL) by cohort					Figure 5D - average category normalized citation impact by year from 1995 to 2020.
	Publication.Date	count	wmean, authors per paper			cohort	pubs_RAonly_TOTAL	count			cohort	pubs_FIRST_ra_only_TOTAL	count			Publication.Date	count	mean, CNCI
1	1995	70	3.75714		1	1997-2004	0	80		1	1997-2004	0	150		1	1995	70	2.37143
2	1996	130	4.69231		2	1997-2004	1	80		2	1997-2004	1	160		2	1996	130	2.66766
3	1997	169	4.29586		3	1997-2004	10	11		3	1997-2004	2	135		3	1997	169	2.1067
4	1998	195	4.41026		4	1997-2004	11	3		4	1997-2004	3	94		4	1998	195	2.63674
5	1999	233	4.72961		5	1997-2004	12	5		5	1997-2004	4	32		5	1999	233	2.25489
6	2000	197	4.86294		6	1997-2004	13	5		6	1997-2004	5	23		6	2000	197	2.61805
7	2001	217	4.91705		7	1997-2004	2	116		7	1997-2004	6	15		7	2001	217	1.79891
8	2002	169	5.01183		8	1997-2004	3	97		8	1997-2004	> 6	16	(not plotted)	8	2002	169	2.27119
9	2003	179	4.95531		9	1997-2004	4	64		9	2005-2012	0	211		9	2003	179	2.49857
10	2004	185	5.6973		10	1997-2004	5	59		10	2005-2012	1	256		10	2004	185	2.01332
11	2005	189	5.38624		11	1997-2004	6	27		11	2005-2012	2	145		11	2005	189	2.11278
12	2006	209	5.45455		12	1997-2004	7	26		12	2005-2012	3	76		12	2006	209	2.00597
13	2007	208	6.06731		13	1997-2004	8	19		13	2005-2012	4	34		13	2007	208	2.09128
14	2008	209	6.01818		14	1997-2004	9	13		14	2005-2012	5	23		14	2008	209	2.83765
15	2009	196	6.78571		15	1997-2004	> 13.9249999999997	20	(not plotted)	15	2005-2012	6	9		15	2009	196	2.61672
16	2010	211	6.41706		16	2005-2012	0	107		16	2005-2012	> 6	9	(not plotted)	16	2010	211	3.95123
17	2011	206	6.72816		17	2005-2012	1	144		17	2013-2020	0	257		17	2011	206	3.05339
18	2012	263	7.14373		18	2005-2012	10	9		18	2013-2020	1	323		18	2012	263	4.37656
19	2013	253	7.62055		19	2005-2012	11	10		19	2013-2020	2	175		19	2013	253	3.77523
20	2014	259	8.46718		20	2005-2012	12	6		20	2013-2020	3	68		20	2014	259	3.43844
21	2015	287	8.42857		21	2005-2012	13	3		21	2013-2020	4	44		21	2015	287	7.17743
22	2016	276	9.80435		22	2005-2012	2	128		22	2013-2020	5	18		22	2016	276	3.63403
23	2017	273	9.17949		23	2005-2012	3	109		23	2013-2020	6	8		23	2017	273	4.07438
24	2018	226	9.11504		24	2005-2012	4	85		24	2013-2020	> 6	3	(not plotted)	24	2018	226	3.47925
25	2019	206	10.2476		25	2005-2012	5	51							25	2019	206	3.88964
26	2020	198	11.2879		26	2005-2012	6	39							26	2020	198	5.49232
					27	2005-2012	7	24
wmean= winsorized mean					28	2005-2012	8	22
					29	2005-2012	9	15
					30	2005-2012	> 13.9249999999997	11	(not plotted)
					31	2013-2020	0	112
					32	2013-2020	1	168
					33	2013-2020	10	15
					34	2013-2020	11	9
					35	2013-2020	12	6
					36	2013-2020	13	4
					37	2013-2020	2	137
					38	2013-2020	3	125
					39	2013-2020	4	95
					40	2013-2020	5	61
					41	2013-2020	6	61
					42	2013-2020	7	32
					43	2013-2020	8	21
					44	2013-2020	9	23
					45	2013-2020	> 13.9249999999997	27	(not plotted)
